# Supplementary material for: Conformational adaptability determining antibody recognition to distomer: structure analysis of enantioselective antibody against chiral drug gatifloxacin
Source: Royal Society of Chemistry journal article supplement (doi:10.1039/d1ra07143b), 2021-01-01
Supplement: d1ra07143b1.pdf [file d1ra07143b1.pdf]

1 **Supplementary Material**

2 **Conformational adaptability determining antibody recognition to distomer:**

3 **Structure analysis of enantioselective antibody against chiral drug gatifloxacin**

4 Lanteng Wang <sup>1</sup>, Wei Xie <sup>2</sup>, Wenyang Jiao <sup>1</sup>, Chijian Zhang <sup>1</sup>, Xiangmei Li <sup>1</sup>, Zhenlin

5 Xu <sup>1</sup>, Xin-an Huang <sup>3</sup>, Hongtao Lei <sup>1\*</sup>, Xing Shen <sup>1\*</sup>

6 <sup>1</sup> *Guangdong Provincial Key Laboratory of Food Quality and Safety, College of Food*

7 *Science, South China Agricultural University, Guangzhou 510642, China*

8 <sup>2</sup> *MOE Key Laboratory of Gene Function and Regulation, State Key Laboratory for*

9 *Biocontrol, School of Life Sciences, Sun Yat-Sen University, Guangzhou 510006,*

10 *China*

11 <sup>3</sup> *Tropical Medicine Institute & South China Chinese Medicine Collaborative*

12 *Innovation Center, Guangzhou University of Chinese Medicine, Guangzhou 510405,*

13 *China*

14

15

16 \* Corresponding authors

17 E-mail: shenxing325@163.com. Tel.: +86-20-8528 3448. Fax: +86-20-8528 0270.

18 (Xing Shen)

19 E-mail: hongtao@scau.edu.cn. Tel.: +86-20-8528 3925. Fax: +86-20-8528 0270.

20 (Hongtao Lei)

21

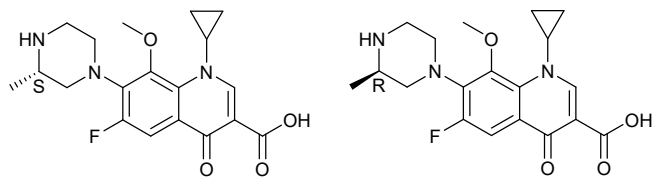

22 **Fig. S1** Structure of gatifloxacin enantiomers.

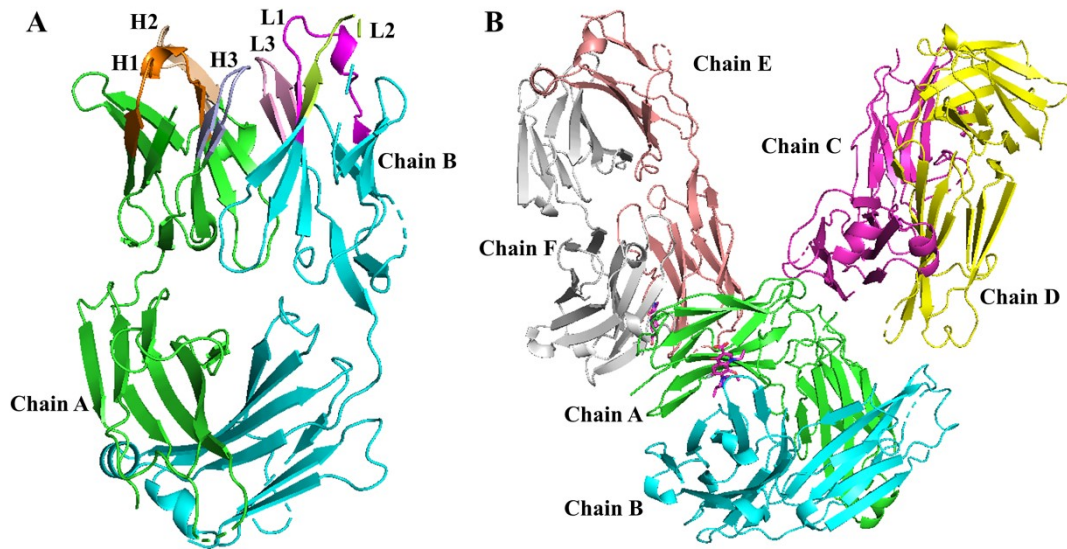

23

24 **Fig. S2** Crystal structures of *S*-GAT Fab in the asymmetric unit. (A) *S*-GAT Fab  
 25 monomer crystal structures (H1: H-CDR1, H2: H-CDR2, H3: H-CDR3, L1: L-CDR1,  
 26 L2: L-CDR2, L3: L-CDR3). (B) *S*-GAT Fab complex crystal structures. Chain A, C  
 27 and E were heavy chains and chain B, D and F were light chains. The images were  
 28 drawn by PyMOL 2.5 software.

29

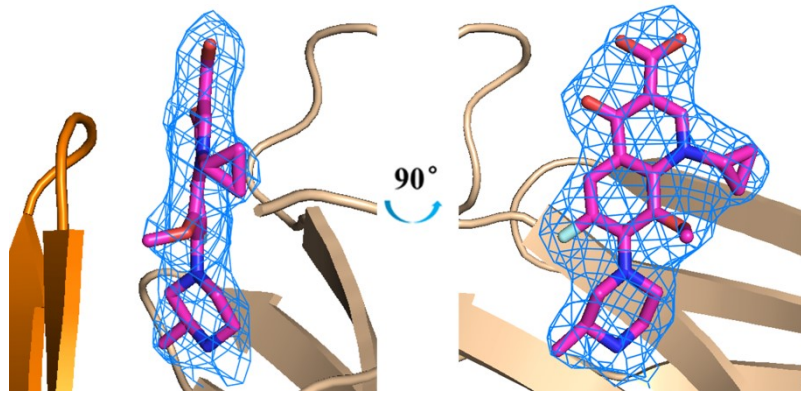

30 **Fig. S3** Electron density of *S*-GAT ligand in *S*-GAT Fab complex structure. The  
31 colors were shown as follows: *S*-GAT ligand for magenta, light chain of *S*-GAT Fab  
32 complex for wheat color, heavy chain of *S*-GAT Fab complex for orange. The images  
33 were drawn by PyMOL 2.5 software.

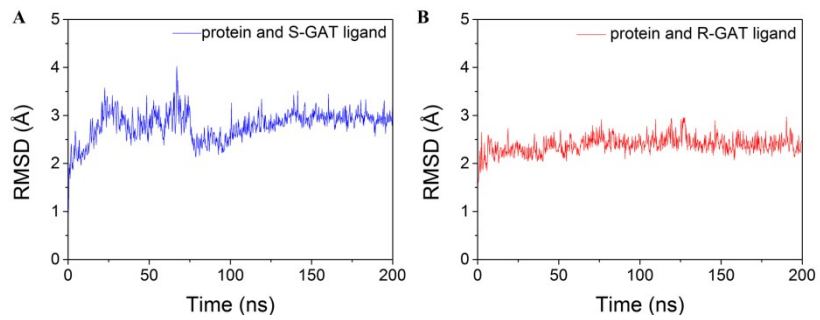

34

35 **Fig. S4** RMSDs for the backbone atoms of the protein and *S*-GAT ligand (A) and *R*-

36 GAT ligand (B) during 200 ns of simulation.

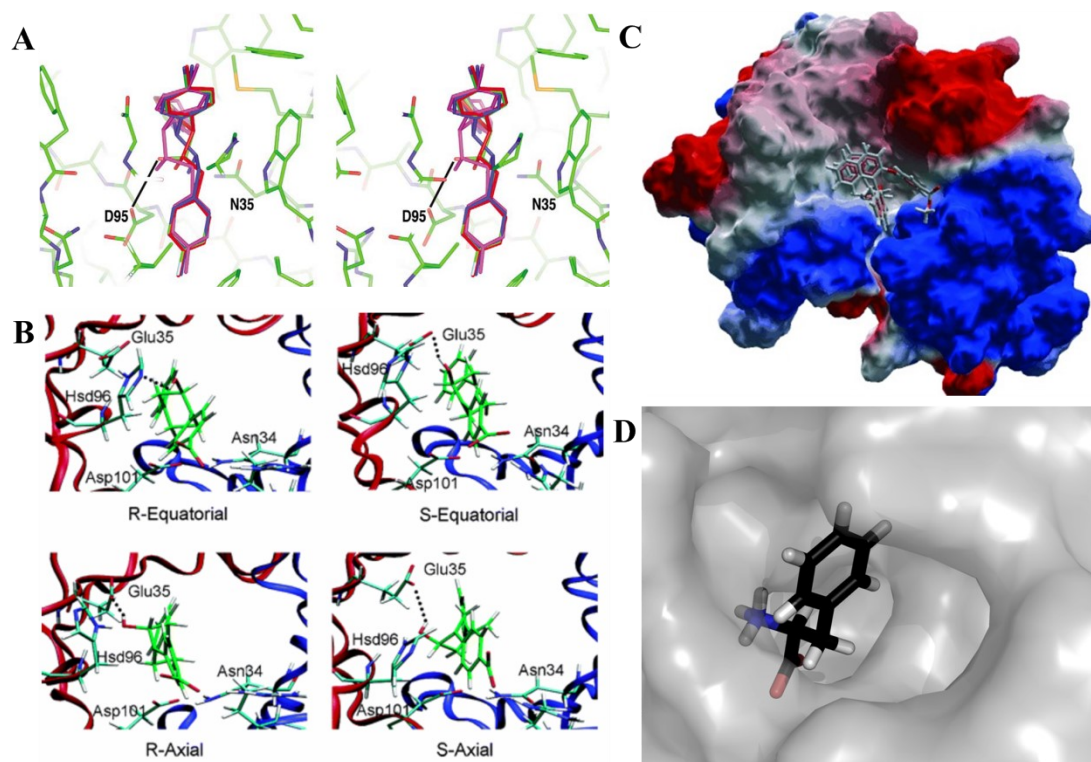

37

38 **Fig. S5** Structure information of enantioselective antibody recognition in previous  
 39 studies. (A) Superimposition of the binding of four different stereoisomers of the  
 40 hapten in ENA11His. The observed *SR*-stereoisomer and protein is coloured  
 41 according to atoms (carbon, green; oxygen, red; nitrogen, blue). The *RS*-stereoisomer  
 42 is in magenta, the *RR* in blue, and the *SS* in red. The residues of Fab (Asp95 and  
 43 Asn35 of the H-chain) important for stereoisomer recognition are labeled. The grey  
 44 line shows the important hydrogen bond between the hydroxyl group of the *SR*-  
 45 stereoisomer and Asp95 of the H-chain, which is suggested to be important for  
 46 enantioselectivity.<sup>1</sup> (B) Detail of the averaged structures of the four different  
 47 conformers of the TS oxy-Cope rearrangement in the active site of the matured AZ28  
 48 antibodies.<sup>2</sup> (C) Binding mode of *R*-BINOL derivative in antibody C2. The antibody  
 49 is displayed with an electrostatic surface representation, where red shows negative  
 50 charge, white neutral, and blue positive.<sup>3</sup> (D) Closeup of the binding pocket of anti-L-

51 AA 80.1R with the docked ligand L-phenylalanine (black) shown in a stick.<sup>4</sup>

52 **Table S1.** Amino acid sequence of *S*-GAT Fab. Sequence has been submitted to  
 53 RCSB of Protein Data Bank along with protein structures, PDB: 7F2S and 7F35.

| Chain                    | Sequence                                                                                                                                                                                                                                      |
|--------------------------|-----------------------------------------------------------------------------------------------------------------------------------------------------------------------------------------------------------------------------------------------|
| Heavy chain <sup>1</sup> | EIQLQQSGPELVKPGTSVKVSCKASGYALTSYTMWVKQ<br>SHGKSLEWIGYIDPYNGGTSYNQKFKGKATLTVDKSSSTA<br>YMHLNSLTSEDSAVYYCAGWNRVDEDWGQGTTLTVSSA<br>KTTPPSVYPLAPGSAAQTNSMVTLGCLVKGYFPEPVTVT<br>WNSGSLSSGVHTFPAVLQSDLYTLSSSVTVPSSTWPSETV<br>TCNVAHPASSTKVDKKIVPRDC |
| Light chain              | DIVLTQSPASLAVSLGQRATISCRITSETIDSYGNSFMHWY<br>QKPGQPPKLLIYRASNLKSGIPARFSGSGSRTDFTLTINPV<br>EADDVATYYCQQTNEVMYTFGGGKLEIKRADAAPT VSI<br>FPPSSEQLTSGGASVVCFLNMFYPKDINVKWKIDGSRQN<br>GVLNSWTDQDSKDYMSSTLTLTKDEYERHNSYTCEA<br>THKTSTSPIVKSFNREK     |

54 <sup>1</sup> CDR sequences were highlighted.



55 **Table S2.** Molecular docking models of *R*-GAT ligand docking to *S*-GAT Fab

56 complex crystal structure.

| No. | Total score | Crash   | Polar  | Similarity | CSCORE |
|-----|-------------|---------|--------|------------|--------|
| 1   | 5.5597      | -1.0407 | 1.0235 | 0.822      | 3      |
| 2   | 5.1187      | -0.7578 | 0.7830 | 0.507      | 0      |
| 3   | 4.9639      | -1.0200 | 0.0045 | 0.535      | 0      |
| 4   | 4.8742      | -0.9572 | 0.0568 | 0.779      | 4      |
| 5   | 4.6340      | -2.0474 | 0.9702 | 0.615      | 0      |
| 6   | 4.4314      | -0.9298 | 1.1385 | 0.500      | 4      |
| 7   | 4.3706      | -1.0167 | 0.1027 | 0.732      | 1      |
| 8   | 4.3388      | -0.4013 | 1.3328 | 0.615      | 1      |
| 9   | 4.3357      | -0.9867 | 0.1121 | 0.738      | 3      |
| 10  | 4.3352      | -1.2577 | 1.0207 | 0.811      | 0      |

58 **Table S3.** Summarization of enantioselective antibody recognition information in previous studies.

| Antibody | Ligand                                                                                  | Ligand structure                                                                     | Enantioselectivity                                                                                                                                                                     | Conformational adaptability                                                                                                                                    | Reference |
|----------|-----------------------------------------------------------------------------------------|--------------------------------------------------------------------------------------|----------------------------------------------------------------------------------------------------------------------------------------------------------------------------------------|----------------------------------------------------------------------------------------------------------------------------------------------------------------|-----------|
| ENA11His | finrozole                                                                               | 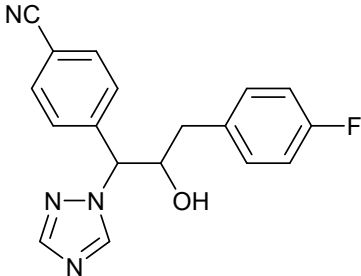   | The affinity of <i>SR</i> - and <i>SS</i> - enantiomers was twice that of <i>RR</i> - and <i>RS</i> - enantiomers.                                                                     | The conformation adjustment of the flexible chain made the position of the three rings stationary.                                                             | [1]       |
| AZ28     | transition state analogue (TSA) of the oxy-cope reaction from the substituted hexadiene |    | The free energy barriers for the <i>S</i> -axial, <i>R</i> -axial, <i>S</i> -equatorial and <i>R</i> -equatorial were 26.8, 24.9, 24.2 and 24.4 kcal·mol <sup>-1</sup> , respectively. | The positions of two benzene rings were relatively fixed, and the hydroxyl groups were combined with different residues because of the different orientations. | [2]       |
| C2       | BINOL derivative                                                                        |  | Antibody could not recognize <i>S</i> -enantiomer.                                                                                                                                     | <i>S</i> -enantiomer could not dock into antibody binding cavity.                                                                                              | [3]       |

59 Continued

| Antibody           | Ligand        | Ligand structure                                                                                                       | Enantioselectivity                              | Conformational adaptability                                                         | Reference |
|--------------------|---------------|------------------------------------------------------------------------------------------------------------------------|-------------------------------------------------|-------------------------------------------------------------------------------------|-----------|
| anti-L-AA<br>80.1R | phenylalanine | 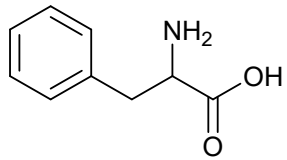<br><chem>NC(Cc1ccccc1)C(=O)O</chem> | Antibody could not recognize<br>D-phenylalanine | Clashes occurred between<br>benzene ring of D-<br>phenylalanine and the<br>antibody | [4]       |
| anti-D-AA<br>67.36 | phenylalanine | <br><chem>NC(Cc1ccccc1)C(=O)O</chem> | Antibody could not recognize<br>L-phenylalanine | Clashes occurred between<br>benzene ring of L-<br>phenylalanine and the<br>antibody | [5]       |

61 **References**

- 62 **1.** T. Parkkinen, T. K. Nevanen, A. Koivula and J. Rouvinen, *J. Mol. Biol.*, 2006,  
63 **357**, 471–480.
- 64 **2.** S. Martí, J. Andrés, V. Moliner, E. Silla, I. Tuñón and J. Bertrán, *J. Phys. Chem.*  
65 *A*, 2006, **110**, 726–730.
- 66 **3.** B. S. Rasmussen, J. M. Pedersen, J. Sørensen, J. Egebjerg, B. Schiøtt, K. K.  
67 Mortensen and T. Skrydstrup, *Chembiochem*, 2007, **8**, 1974–1980.
- 68 **4.** D. I. Ranieri, H. Hofstetter and O. Hofstetter, *J. Sep. Sci.*, 2009, **32**, 1686–1695.
- 69 **5.** D. I. Ranieri, D. M. Corgliano, E. J. Franco, H. Hofstetter and O. Hofstetter,  
70 *Chirality*, 2008, **20**, 559–570.
